# Supplementary material for: Impact of age at type 2 diabetes mellitus diagnosis on mortality and vascular complications: systematic review and meta-analyses
Source: Springer Nature journal article supplement (doi:10.1007/s00125-020-05319-w), 2020-12-14
Supplement: MOESM1 [file 18681270]

**Electronic Supplementary Material: Impact of age at type 2 diabetes mellitus diagnosis on mortality and vascular complications: systematic review and meta-analyses**

---

## Methods - Search strategy: MeSH terms for Medline (equivalent searches used for other databases)

- 1 exp Diabetes Mellitus, Type 2/
- 2 (MODY or NIDDM or TIID or T2D\*).mp.
- 3 (non insulin\* depend\* or noninsulin\* depend\* or noninsulin?depend\* or non insulin?depend\*).tw.
- 4 ((typ? 2 or typ? II or typ?2 or typ?II) adj3 diabet\*).tw.
- 5 ((late or adult\* or matur\*) adj3 onset adj3 diabet\*).tw.
- 6 or/1-5
- 7 exp Diabetes Insipidus/
- 8 diabet\* insipidus.tw.
- 9 7 or 8
- 10 6 not 9
- 11 AGE OF ONSET.mp.
- 12 (age adj3 onset).mp.
- 13 AGE FACTORS.mp.
- 14 Age Factors/
- 15 (age adj3 diagnos\*).mp.
- 16 or/11-15
- 17 (DISEASE adj3 PROGRESSION).mp.
- 18 Disease Progression/
- 19 Prognosis/
- 20 PROGNOSIS.mp.
- 21 or/17-20
- 22 10 and 16 and 21
- 23 exp Diabetes Complications/
- 24 exp Diabetes Mellitus, Type 2/co
- 25 23 or 24
- 26 10 and 16 and 25
- 27 22 or 26
- 28 limit 27 to english language
- 29 exp animals/ not humans.sh.
- 30 28 not 29
- 31 30 or 22

\* The numbers in the search strategy correspond to the line number of the query

ESM Table 1

**PICO – Inclusion/ Exclusion criteria**

|                           | <b>Participants (P)</b>                                                                                             | <b>Intervention (I)</b>    | <b>Comparison (C)</b>                                            | <b>Outcomes (O)</b>                                                                                                                                                                    | <b>Study Type</b>                                                | <b>Limits</b>                                                     |
|---------------------------|---------------------------------------------------------------------------------------------------------------------|----------------------------|------------------------------------------------------------------|----------------------------------------------------------------------------------------------------------------------------------------------------------------------------------------|------------------------------------------------------------------|-------------------------------------------------------------------|
| <b>Inclusion Criteria</b> | Adults with Type 2 Diabetes (>18 years)                                                                             | Nil, Observational Studies | Early Vs Late Onset Diabetes<br>Comparable Duration<br>Subgroups | All-cause mortality<br>Retinopathy<br>Nephropathy<br>Neuropathy<br>Cardiovascular Disease<br>Cerebrovascular Disease<br>Peripheral Vascular Disease<br>Cognitive Impairment<br>Frailty | Observational<br>Case Control<br>Prospective<br>Comparator Group | English articles<br><br>No time restriction<br><br>Human subjects |
| <b>Exclusion Criteria</b> | No Diabetes<br>Type 1 Diabetes<br>Other Diabetes Eg Type 1, Gestational, Secondary, Monogenic<br>Diabetes Insipitus | Nil                        | Other Factors eg Glycaemic Control                               | Outcomes Unrelated To Diabetes Complications                                                                                                                                           | Editorials<br>Letters<br>Narrative Reviews                       | Non-English Articles<br>Non-Human Subjects                        |

## ESM Table 2 – Risk of bias

Table 2: Risk of bias ratings (Centre for Clinical Effectiveness, 2010).

| <b>Rating</b>       | <b>Description</b>                                                                                                                                   |
|---------------------|------------------------------------------------------------------------------------------------------------------------------------------------------|
| <b>Low (L)</b>      | All of the criteria have been fulfilled or where criteria have not been fulfilled it is very unlikely the conclusions of the study would be affected |
| <b>Moderate (M)</b> | Some of the criteria have been fulfilled and those criteria that have not been fulfilled may affect the conclusions of the study                     |
| <b>High (H)</b>     | Few or no criteria fulfilled or the conclusions of the study are likely or very likely to be affected                                                |

**ESM Table 3: Risk of bias assessment**

| Study Authors                    | Selection bias, study participants representative | Detection bias             |                           | Nil reporting bias, free of selective outcome reporting | Assessment of confounding in original analysis | Conflict of interest | Overall risk of bias |
|----------------------------------|---------------------------------------------------|----------------------------|---------------------------|---------------------------------------------------------|------------------------------------------------|----------------------|----------------------|
|                                  |                                                   | Adequate exposure measures | Adequate outcome measures |                                                         |                                                |                      |                      |
| Amutha A, Anjana RM., et al      | Yes                                               | Yes                        | Yes                       | Yes                                                     | Yes                                            | No                   | Low                  |
| Amutha A, Datta M, et al         | Yes                                               | Yes                        | Yes                       | Yes                                                     | Yes                                            | No                   | Low                  |
| Cai, X., et al.                  | Yes                                               | Partial                    | Yes                       | Yes                                                     | Yes                                            | No                   | Low                  |
| Chan, J.C., et al                | Yes                                               | Yes                        | Yes                       | Yes                                                     | Yes                                            | No                   | Low                  |
| Chen, M.S., et al                | Partial                                           | Partial                    | Yes                       | Yes                                                     | Yes                                            | NR                   | Medium               |
| Hamman, R.F., et al              | Yes                                               | Partial                    | Yes                       | Yes                                                     | Yes                                            | NR                   | Medium               |
| Huo, L., et al                   | Yes                                               | Yes                        | Yes                       | Yes                                                     | Yes                                            | No                   | Low                  |
| Huo, X., et al                   | Yes                                               | Yes                        | Yes                       | Yes                                                     | Yes                                            | No                   | Low                  |
| Kenealy, T., et al               | Yes                                               | Yes                        | Yes                       | Yes                                                     | Yes                                            | No                   | Low                  |
| Nanayakkara, N., et al           | Yes                                               | Yes                        | Yes                       | Yes                                                     | Yes                                            | No                   | Low                  |
| Pavkov, M.E., et al              | Yes                                               | Yes                        | Yes                       | Yes                                                     | Yes                                            | No                   | Low                  |
| Pradeepa R, Anjana RM., et al    | Yes                                               | Yes                        | Yes                       | Yes                                                     | Yes                                            | No                   | Low                  |
| Pradeepa R, Chella S., et al     | Yes                                               | Yes                        | Yes                       | Yes                                                     | Yes                                            | No                   | Low                  |
| Pradeepa R, Rema M., et al       | Yes                                               | Yes                        | Yes                       | Yes                                                     | Yes                                            | No                   | Low                  |
| Pugliese, G., et al              | Yes                                               | Yes                        | Yes                       | Yes                                                     | Yes                                            | No                   | Low                  |
| Pugliese, G., et al              | Yes                                               | Yes                        | Yes                       | Yes                                                     | Yes                                            | No                   | Low                  |
| Rema, M., et al                  | Yes                                               | Yes                        | Yes                       | Yes                                                     | Yes                                            | No                   | Low                  |
| Romero-Aroca, P., et al          | Yes                                               | Yes                        | Yes                       | Yes                                                     | Yes                                            | No                   | Low                  |
| Song, S.H. and C.A. Hardisty     | Yes                                               | Yes                        | Yes                       | Yes                                                     | Yes                                            | No                   | Low                  |
| Song, S.H. and T.A. Gray         | Yes                                               | Yes                        | Yes                       | Yes                                                     | Yes                                            | No                   | Low                  |
| Thomas, R.L et al                | Yes                                               | Yes                        | Yes                       | Yes                                                     | Yes                                            | No                   | Low                  |
| Unnikrishnan, R. Anjana., et al  | Yes                                               | Yes                        | Yes                       | Yes                                                     | Yes                                            | No                   | Low                  |
| Unnikrishnan, Rl, Rema M., et al | Yes                                               | Yes                        | Yes                       | Yes                                                     | Yes                                            | No                   | Low                  |
| Wong, J., et al                  | Yes                                               | Yes                        | Yes                       | Yes                                                     | Yes                                            | NR                   | Low                  |
| Yeung, R.O.,                     | Yes                                               | Yes                        | Yes                       | Yes                                                     | Yes                                            | No                   | Low                  |
| Zoungas, S., et al               | Yes                                               | Yes                        | Yes                       | Yes                                                     | Yes                                            | No                   | Low                  |

NR = not reported

## ESM Figure 1 - Age at diabetes diagnosis adjusted for diabetes duration

### Primary Outcomes

#### All-cause mortality

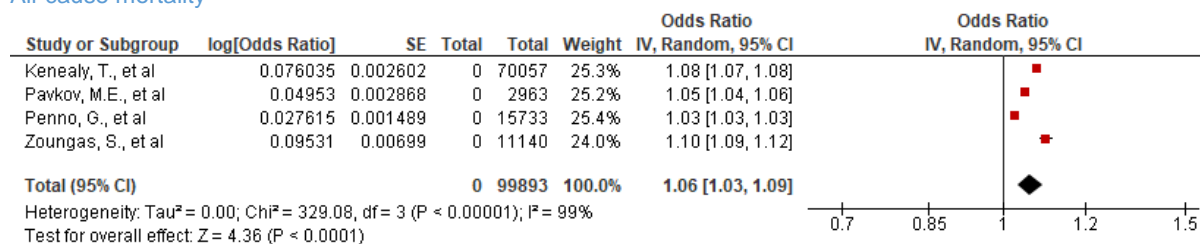

#### Macrovascular disease

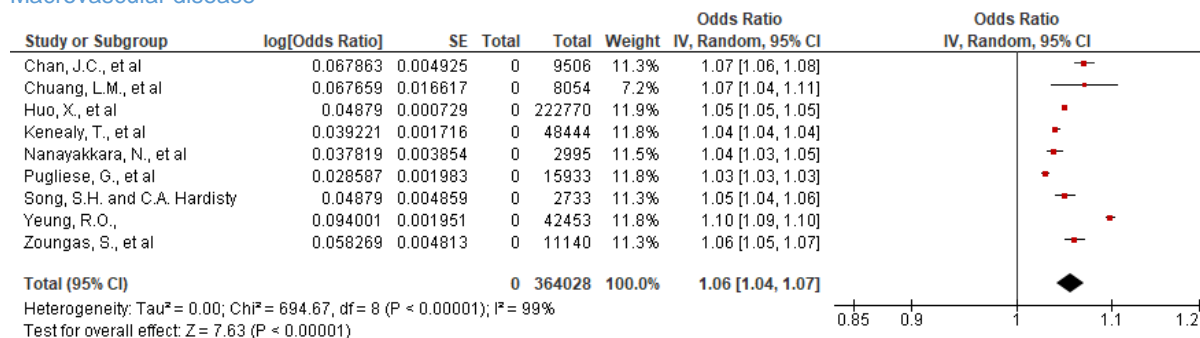

#### Microvascular disease

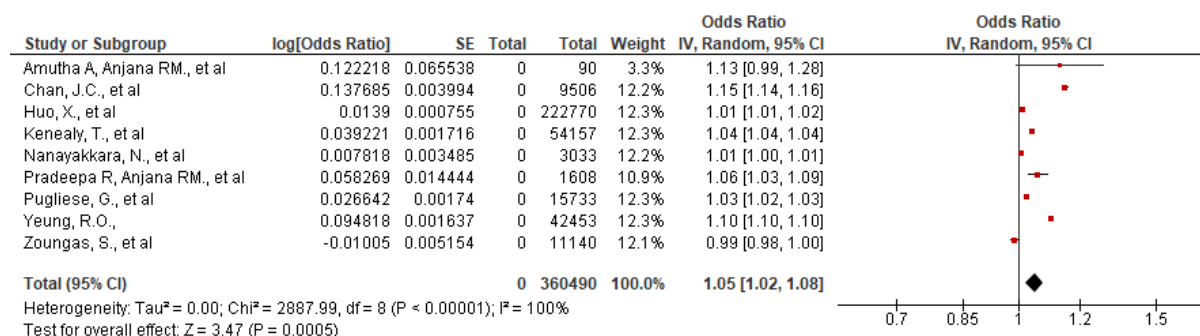

ESM Figure 1: Effect of age at diagnosis (as a continuous variable), adjusted for diabetes duration on the risk of all-cause mortality, macrovascular and microvascular disease. The symbols are proportional to the study weight and horizontal lines represent 95% confidence intervals.

## ESM Figure 2 - Publication bias

### All-cause mortality

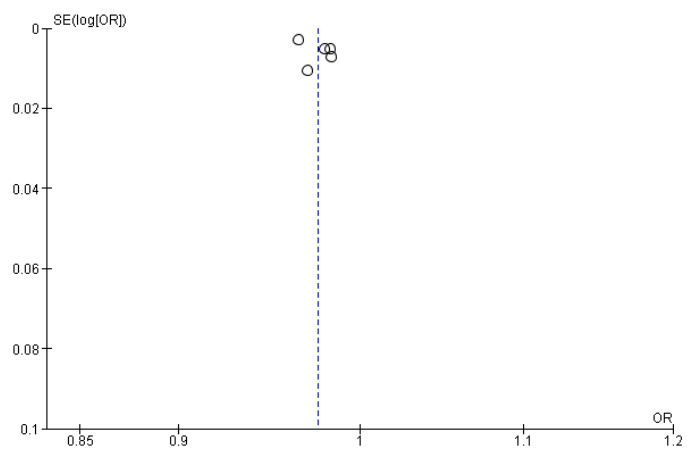

### Macrovascular disease

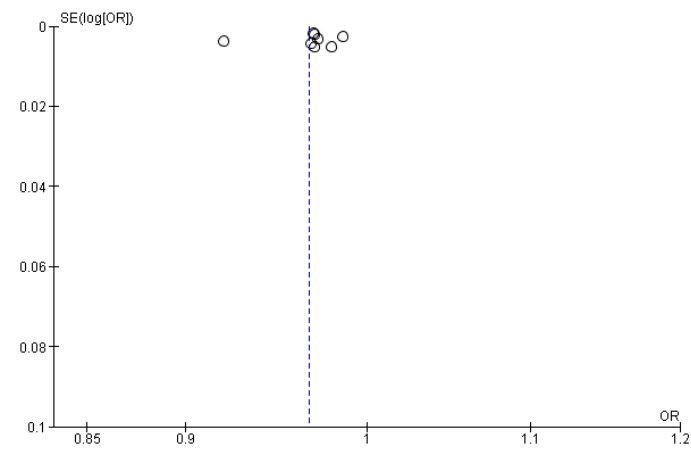

### Microvascular disease

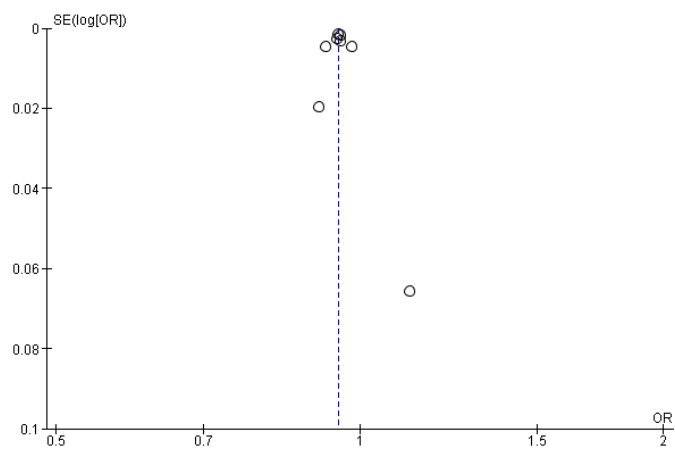

ESM Figure 2: Funnel plot of comparison, all-cause mortality, macrovascular and microvascular disease. Dotted line represents effect estimate. Circles represent individual studies.
